# Supplementary material
Source: ML conference proceedings conference paper supplement (https://openreview.net/forum?id=BuOcoU8jqxq)
Supplement: supplementary_material [file attachment]

---

# Supplementary Material for “Quantum Perceptron Revisited: Computational-Statistical Tradeoffs”

---

Mathieu Roget<sup>1,2</sup>

Giuseppe Di Molfetta<sup>1</sup>

Hachem Kadri<sup>1</sup>

<sup>1</sup>Aix-Marseille University, CNRS, LIS, Marseille, France

<sup>2</sup>École Normale Supérieure de Lyon, Lyon, France

## 1 PROOFS

In this appendix, we present the proofs of Theorems 4 and 5.

### 1.1 PROOF OF THEOREM 4

After proving a few useful lemma, we provide here the proof of the complexity of our HYBRID QUANTUM PERCEPTRON.

**Lemma 1.** *Let’s define  $K = \left\lceil \frac{\ln(\epsilon/2)}{\ln(1 - \sqrt{2}\gamma/\sqrt{\pi})} \right\rceil$ , then it holds that*

$$K \sim \sqrt{\frac{\pi}{2}} \frac{\ln(1/\epsilon)}{\gamma}.$$

*Proof.* Using a Taylor expansion for  $\ln(1 - x)$  in 0 we get

$$\begin{aligned} \sqrt{\frac{\pi}{2}} \frac{\ln(1/\epsilon)}{K\gamma} &= \sqrt{\frac{\pi}{2}} \frac{\ln(1/\epsilon) \ln(1 - \sqrt{2}\gamma/\sqrt{\pi})}{\gamma \ln(\epsilon/2)} \\ &= \sqrt{\frac{\pi}{2}} \frac{\ln(1/\epsilon) \left[ -\sqrt{2}\gamma/\sqrt{\pi} + o_{\gamma \rightarrow 0}(\gamma) \right]}{\gamma \ln(\epsilon/2)} \\ &\xrightarrow{\gamma \rightarrow 0} \frac{\ln(1/\epsilon)}{\ln(1/\epsilon) + \ln(2)} \\ &\xrightarrow{\epsilon \rightarrow 0} 1. \end{aligned}$$

Thus  $K \sim \sqrt{\frac{\pi}{2}} \frac{\ln(1/\epsilon)}{\gamma}$ . □

**Lemma 2.** *Let’s define  $K2 = \left\lceil \log_{3/4} \left( 1 - \left( 1 - \frac{\epsilon}{2} \right)^{\frac{1}{K-1}} \right) \right\rceil$ , then it holds that*

$$K2 \sim \log_{3/4}(\epsilon\gamma).$$

*Proof.* Using a Taylor expansion for  $\ln(1 - \epsilon/2)$  and  $\ln(1 - \sqrt{\frac{2}{\pi}}\gamma)$  in 0 we get

$$(1 - \epsilon/2)^{\frac{1}{K-1}} = \exp \left( \frac{\ln(1 - \epsilon/2) \ln(1 - \sqrt{\frac{2}{\pi}}\gamma)}{\ln(\epsilon/2) - \ln(1 - \sqrt{\frac{2}{\pi}}\gamma)} \right) = \exp(-\alpha)$$

where

$$\alpha = \frac{1}{\sqrt{2\pi}} \frac{\epsilon\gamma}{\ln(\epsilon/2) - \ln(1 - \sqrt{\frac{2}{\pi}}\gamma)} + o(\epsilon\gamma) \sim \frac{1}{\sqrt{2\pi}} \frac{\epsilon\gamma}{\ln(\epsilon/2) - \ln(1 - \sqrt{\frac{2}{\pi}}\gamma)}.$$

Using  $\ln(1 - e^{-x}) \underset{x \rightarrow 0}{\sim} \ln(x)$ , it holds that

$$K_2 = \log_{3/4}(1 - e^{-\alpha}) \sim \log_{3/4}(\alpha) \sim \log_{3/4}(\epsilon\gamma).$$

□

**Theorem 4.** *Let  $S$  be a linearly separable sample of  $N$  points of margin  $\gamma$ . Algorithm HYBRID QUANTUM PERCEPTRON finds a perfect separator with probability at least  $1 - \epsilon$  and has a complexity of*

$$O\left(\frac{\sqrt{N}}{\gamma} \ln(1/\epsilon) \ln\left(\frac{1}{\gamma\epsilon}\right)\right).$$

*Proof.* The algorithm can fail because of two reasons. It is possible that none of the hyperplanes  $w_i$ ,  $i = 1, \dots, K$ , separate the classes and it is also possible that the quantum search gives a wrong result.

The exact value of  $K$  we take is  $K = \left\lceil \frac{\ln(\epsilon/2)}{\ln(1 - \sqrt{2/\pi}\gamma/\sqrt{\pi})} \right\rceil = O\left(\frac{\ln(1/\epsilon)}{\gamma}\right)$  because of lemma 2. The probability that a randomly drawn hyperplane separates the data is  $\sqrt{2/\pi}\gamma$  (from Wiebe et al., 2016, Proof of theorem 2). Thus, the probability that at least one hyperplane separates the classes is

$$\mathbb{P}(\text{separating } w \text{ exists}) = 1 - \left(1 - \sqrt{\frac{2}{\pi}}\gamma\right)^K \geq \left(1 - \sqrt{\frac{2}{\pi}}\gamma\right)^{\frac{\ln(\epsilon/2)}{\ln(1 - \sqrt{2/\pi}\gamma/\sqrt{\pi})}} = 1 - \frac{\epsilon}{2}.$$

Next we will assume that one of the  $K$  hyperplanes separates the classes. The algorithm will still return a wrong answer if it identifies a non-separating hyperplane as a separating one. The worst case is when the separating hyperplane is the  $K^{\text{th}}$  one. The probability that  $K - 1$  non-separating hyperplanes are all correctly identified is

$$\left(1 - \frac{3}{4}\right)^{K-1} \geq 1 - \frac{\epsilon}{2},$$

where

$$K_2 = \left\lceil \log_{3/4}\left(1 - \left(1 - \frac{\epsilon}{2}\right)^{\frac{1}{K-1}}\right) \right\rceil = O(\ln(1/(\gamma\epsilon))) \text{ (from lemma 2).}$$

The probability of failure is then bounded by

$$\mathbb{P}(\text{failure}) \leq \underbrace{\frac{\epsilon}{2}}_{\text{separating } w \text{ doesn't exist}} + \underbrace{\frac{\epsilon}{2}}_{\text{one non-separating hyperplane misidentified}} = \epsilon$$

and the complexity is

$$O(KK_2\sqrt{N}) = O\left(\frac{\sqrt{N}}{\gamma} \ln(1/\epsilon) \ln\left(\frac{1}{\gamma\epsilon}\right)\right)$$

which concludes the proof. □

## 1.2 PROOF OF THEOREM 5

For proving Theorem 5, the following definition and lemma are useful.

**Definition 1.** We define the Leave-one-out (LOO) error on a dataset  $S$  by

$$\hat{R}_{LOO}(S) = \frac{1}{N} \sum_{i=1}^N \mathbb{1}\{h_{S-\{x_i\}}(x_i) \neq y_i\}, \quad (1)$$

where  $h_{S-\{x_i\}}$  is the hypothesis returned by HYBRID QUANTUM PERCEPTRON on  $S - \{x_i\}$ , which is the same as  $S$  except that  $x_i$  has been deleted.

The lemma below shows the link between the expected risk and the Leave-one-out error.

**Lemma 3** (Mohri et al., 2018, Lemma 5.3). *For any  $N \geq 1$ ,*

$$\mathbb{E}_{S \sim \mathcal{D}^N} [R(h_S)] = \mathbb{E}_{S' \sim \mathcal{D}^{N+1}} [\hat{R}_{LOO}(S')].$$

**Theorem 5.** *Assume that the data is linearly separable. Let  $h_S$  be the hypothesis returned by the HYBRID QUANTUM PERCEPTRON algorithm after training over a sample  $S$  of size  $N$  drawn according to some distribution  $\mathcal{D}$ . Then, the expected error of  $h_S$  is bounded as follows:*

$$\mathbb{E}_{S \sim \mathcal{D}^N} (R(h_S)) \leq \sqrt{\frac{\pi}{2}} \frac{\log 1/\epsilon}{N+1} \mathbb{E}_{S \sim \mathcal{D}^{N+1}} \left( \frac{1}{\gamma_S} \right).$$

*Proof.* The proof is based on computing an upper bound of the Leave-one-out error. Since the hyperplanes are drawn beforehand, they are the same for all instances  $(S - \{x_i\})_i, \forall i = 1, \dots, N$ . We also assume that there is at least one hyperplane that separates the training set  $S$  of size  $N$  (true with probability  $1 - \epsilon$ ). If  $N \leq K$  then the number of errors in  $\hat{R}_{LOO}$  is naturally bounded by  $N \leq K$  so it holds that  $\hat{R}_{LOO} \leq K/N$ . Thus we can restrict ourselves to the non trivial case where  $K < N$ .

We know that there is an hyperplane that separates the training set  $S$  correctly. Apart this hyperplane, noted  $w_K$ , the worst scenario is when the other ones all classify correctly all the data except one. Without loss of generality we consider that each  $w_k$  misclassifies only  $x_k, \forall 1 \leq i < K$ . So we will have one error for each of the  $K - 1$  first predictions. Now, when HYBRID QUANTUM PERCEPTRON is trained on  $S - \{x_i\}, \forall K \leq i \leq N$ , the algorithm will choose the hyperplane  $w_K$  because it is the only one that correctly separates  $S - \{x_i\}$  for  $i = K, \dots, N$ . Since  $w_K$  is the hyperplane returned by HYBRID QUANTUM PERCEPTRON on all the sample  $S$ , it will also correctly classify the points  $x_i, \forall K \leq i \leq N$ . Hence it holds that

$$\hat{R}_{LOO} \leq \frac{K}{N}.$$

Using Lemma 3 and  $K \sim \sqrt{\frac{\pi}{2}} \frac{\ln(1/\epsilon)}{\gamma}$  (lemma 1), we obtain

$$\mathbb{E}_{S \sim \mathcal{D}^N} (R(h_S)) \leq \sqrt{\frac{\pi}{2}} \frac{\log 1/\epsilon}{N+1} \mathbb{E}_{S \sim \mathcal{D}^{N+1}} \left( \frac{1}{\gamma_S} \right).$$

□

## References

Mehryar Mohri, Afshin Rostamizadeh, and Ameet Talwalkar. *Foundations of machine learning*. MIT press, 2nd edition, 2018.

Nathan Wiebe, Ashish Kapoor, and Krysta M Svore. Quantum perceptron models. In *NIPS*, 2016.
